# Supplementary material for: The St Andrews Institute for Clinical Research: An early Experiment in Collaboration: An early Experiment in Collaboration
Source: Springer Nature journal article supplement (doi:10.1186/s12889-023-17500-y), 2002-01-01
Supplement: MOESM1 [file 26583114]

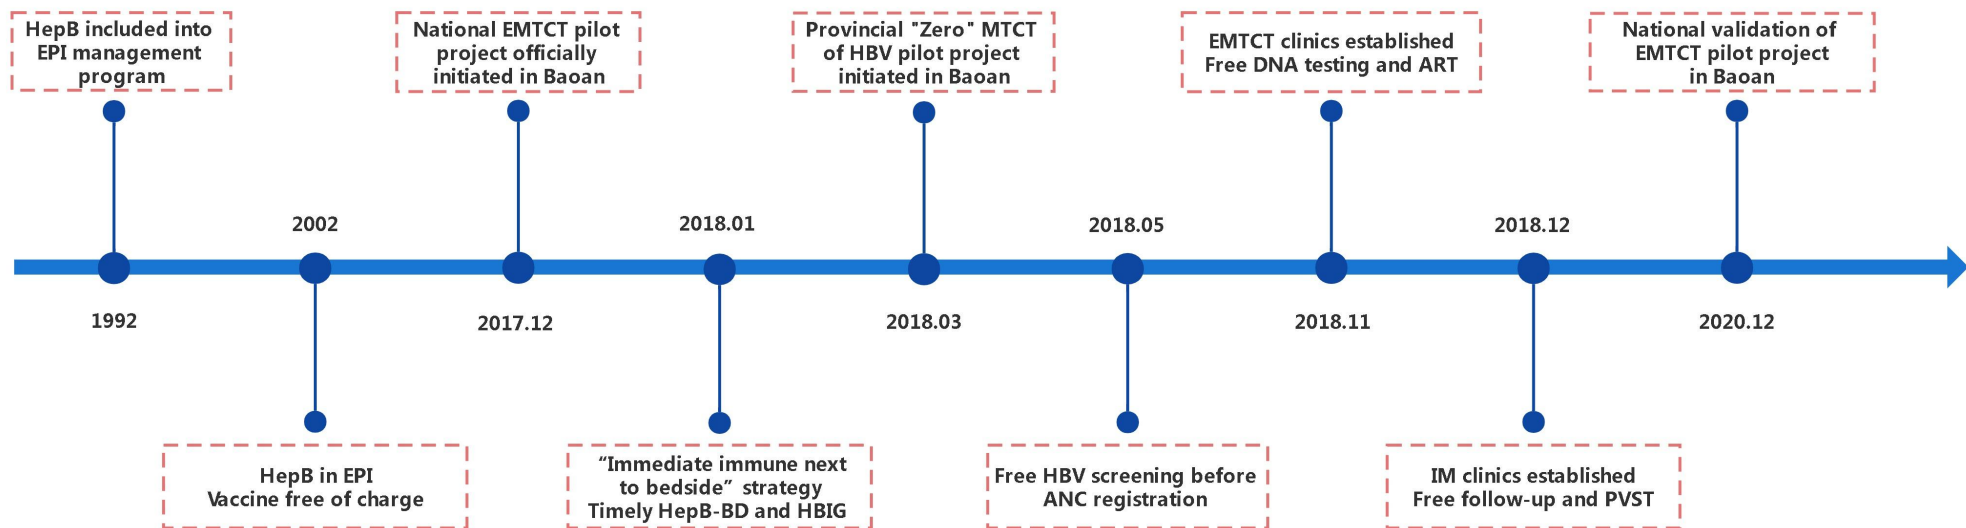

**Figure S1 The progress of HBV EMTCT strategies in Baoan district**

Note: *HepB* Hepatitis B, *EPI* Expanded Program on Immunization, *EMTCT* Elimination of Mother-To-Child Transmission, *HBIG* Hepatitis B Immunoglobulin, *HepB-BD* Hepatitis B Birth Dose vaccine, ANC Antenatal Care, IM Immunological Monitoring, ART Antiviral Therapy

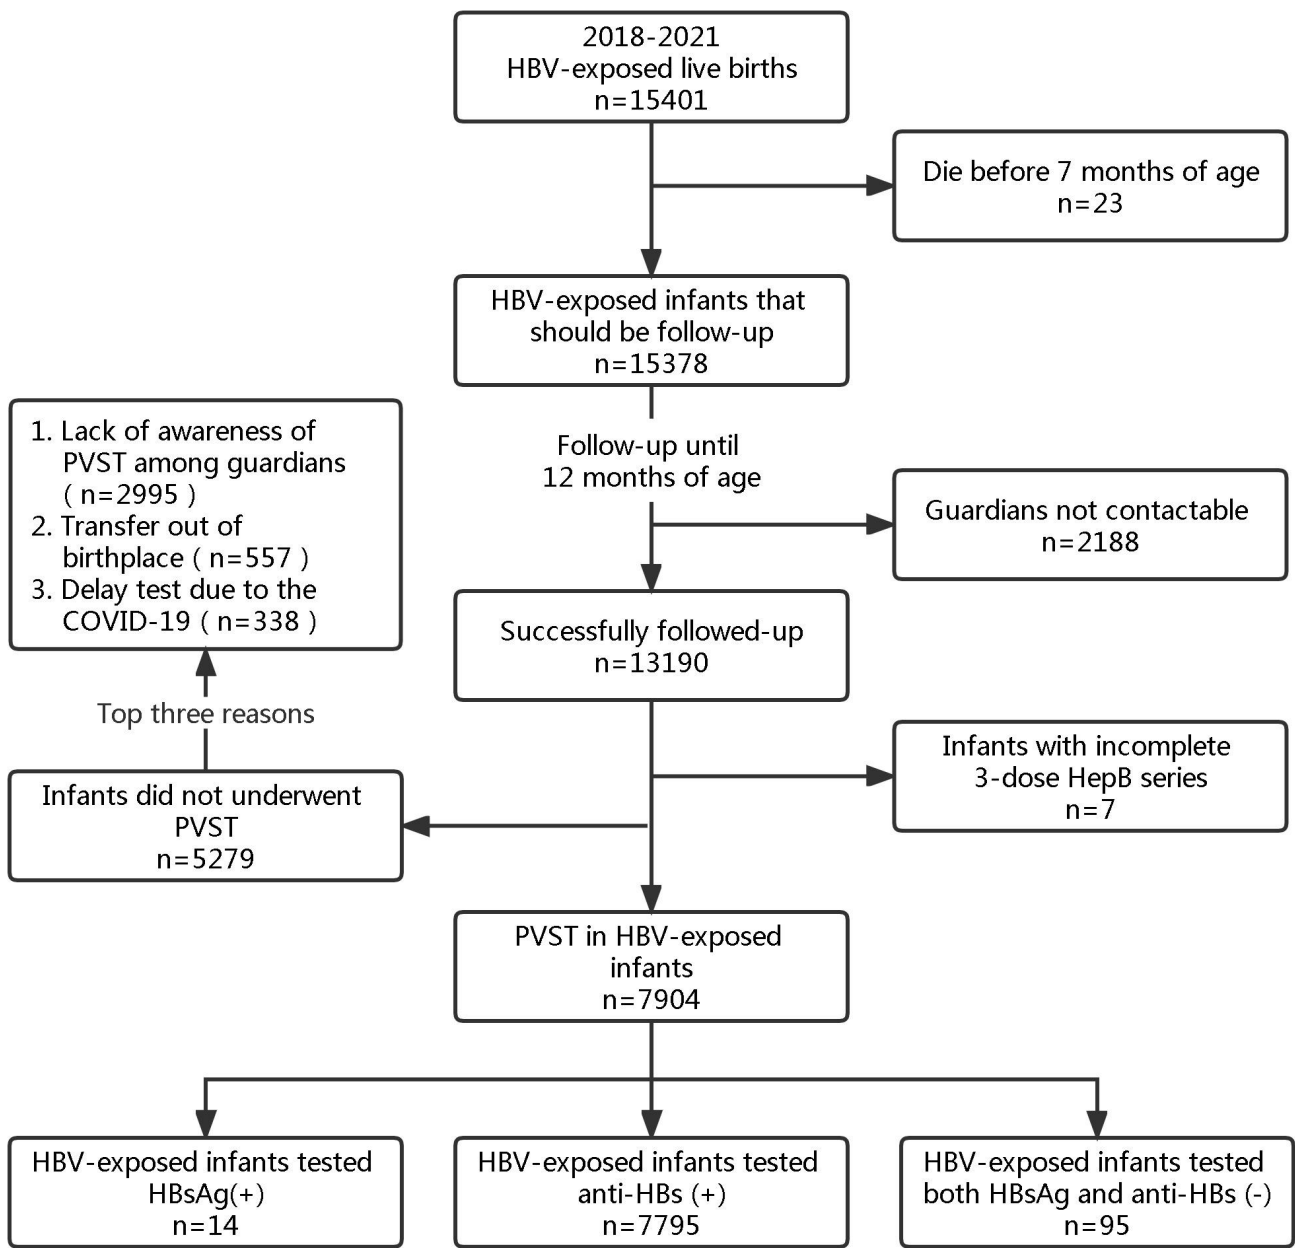

Figure S2 The included process of HBV-exposed infants who underwent PVST in Baoan district
