# Supplementary material for: The St Andrews Institute for Clinical Research: An early Experiment in Collaboration: An early Experiment in Collaboration
Source: Springer Nature journal article supplement (doi:10.1186/s12889-023-17500-y), 2002-01-01
Supplement: MOESM2 [file 26583114]

## Supplementary Tables

**Table S1 Sheet 4-1 Registration Form for pregnant women with HBV infection and their newborns**

\_\_\_\_\_ Province (autonomous region, city) \_\_\_\_\_ County (district)

1. Essential Information  
 Name: \_\_\_\_\_ ID number: \_\_\_\_\_  
 Date of birth: \_\_\_\_\_ year \_\_\_\_\_ month \_\_\_\_\_ day  
 Ethnic groups:  Han,  Zhuang,  Man,  Hui,  Miao,  Uygu,  Yi,  Tujia,  Mongolian,  Tibetan,  other: \_\_\_\_\_  
 Education level:  unknown,  illiterate/semi-illiterate,  primary school,  junior high school,  senior high school (including technical secondary school, vocational high school, technical school, etc.)  junior college or university,  master's degree or above  
 Occupation:  students (graduate student, university, middle school),  teacher,  nurse and nanny,  food and beverage industry,  business services,  medical staff,  workers,  farmers,  herdsmen,  fishing (boat) people,  cadres and staff,  retired personnel,  housework and unemployed,  others: \_\_\_\_\_,  not quite clear  
 Marital status:  unmarried,  first marriage,  re-marriage,  cohabitation,  divorce,  widowed  
 Pregnancy and childbirth situation: Gravidity: \_\_\_\_\_, Parity: \_\_\_\_\_, Number of existing children: \_\_\_\_\_  
 Present address: \_\_\_\_\_ economize \_\_\_\_\_ market \_\_\_\_\_ County (district) \_\_\_\_\_ Township (town, street) \_\_\_\_\_ village \_\_\_\_\_ (house number)  
 Registered permanent residence: \_\_\_\_\_ economize \_\_\_\_\_ market \_\_\_\_\_ County (district) \_\_\_\_\_ Township (town, street) \_\_\_\_\_ village \_\_\_\_\_ (house number)  
 The last menstrual time of this pregnancy: \_\_\_\_\_ year \_\_\_\_\_ month \_\_\_\_\_ day  
 Contact number: \_\_\_\_\_

2. Maternal hepatitis B virus-related testing situation (with + or-)

| Test time and gestational age | Detection results |          |       |          |          |                 |
|-------------------------------|-------------------|----------|-------|----------|----------|-----------------|
|                               | HBsAg             | anti-HBs | HBeAg | anti-HBe | anti-HBc | HBV-DNA (IU/ml) |
| _____ weeks _____ day         |                   |          |       |          |          |                 |
| _____ weeks _____ day         |                   |          |       |          |          |                 |
| _____ weeks _____ day         |                   |          |       |          |          |                 |

3. Maternal women receiving antiviral treatment (ART) during pregnancy:  
 not receiving ART during pregnancy  
 receiving ART during pregnancy, gestational age at the start of medication: \_\_\_\_\_ weeks \_\_\_\_\_ day  
 Medications:  tenofovir,  tibivudine,  lamivudine,  other: \_\_\_\_\_

4. Date of delivery: \_\_\_\_\_ year \_\_\_\_\_ month \_\_\_\_\_ day, gestational age of delivery: \_\_\_\_\_ weeks \_\_\_\_\_ day

5. Mode of delivery:  natural delivery,  vaginal midwifery,  elective cesarean section,  emergency cesarean section,  unknown

6. Place of delivery:  municipal or above midwifery institutions,  county (district) level midwifery institutions,  township (sub-district) level midwifery institutions,  home,  other: \_\_\_\_\_  
 Name of the delivery institution: \_\_\_\_\_

7. Information of newborn infants (if there are multiple live births, please fill in the basic information and vaccination status of the infants in the attached sheet respectively)  
 Name: \_\_\_\_\_ Gender:  male,  female  
 Birth weight: \_\_\_\_\_ gram, birth length: \_\_\_\_\_ cm, time of birth: \_\_\_\_\_ year \_\_\_\_\_ month \_\_\_\_\_ day \_\_\_\_\_ hour \_\_\_\_\_ minute  
 Survival:  survival,  death, and cause of death: \_\_\_\_\_, time of death: \_\_\_\_\_ year \_\_\_\_\_ month \_\_\_\_\_ day

8. The first dose of hepatitis B vaccine vaccination:  vaccination,  not vaccinated (after filling in the reason, jump to "9"), the reason: \_\_\_\_\_  
 Time of vaccination: \_\_\_\_\_ year \_\_\_\_\_ month \_\_\_\_\_ day \_\_\_\_\_ hour \_\_\_\_\_ minute,  unknown  
 Vaccine type:  recombinant yeast,  recombinant CHO, vaccination dose:  10g,  20g,  other: \_\_\_\_\_

9. Hepatitis B immunoglobulin injection:  injection within 12 hours,  >12 hours of injection,  without injection, the reason: \_\_\_\_\_  
 Time of injection: \_\_\_\_\_ year \_\_\_\_\_ month \_\_\_\_\_ day \_\_\_\_\_ hour \_\_\_\_\_ minute,  unknown  
 Injection dose:  100 IU,  other: \_\_\_\_\_

Reporting institution (seal): \_\_\_\_\_ Reporter: \_\_\_\_\_  
 Contact number: \_\_\_\_\_ Completion date: \_\_\_\_\_ year \_\_\_\_\_ month \_\_\_\_\_ day

**Table S2 Sheet 4-II Follow-up Form for infants born to pregnant women with HBV infection**

\_\_\_\_\_ Province (autonomous region, city) \_\_\_\_\_ County (district)

1. The Child's name: \_\_\_\_\_, Gender:  male,  female, Date of birth: \_\_\_\_\_ year \_\_\_\_\_ month \_\_\_\_\_ day, Contact number: \_\_\_\_\_  
 Age: \_\_\_\_\_ months, Date of Follow-up: \_\_\_\_\_ year \_\_\_\_\_ month \_\_\_\_\_ day, Name of the follow-up staff: \_\_\_\_\_

2. Follow-up of children: (if there are multiple live births, please separate schedule)

(1) Name of the follow-up institution: \_\_\_\_\_

(2) Follow-up:  not follow-up,  successful follow-up,  lost to follow-up, reason: \_\_\_\_\_

(Children not reported loss to follow-up until 15 months of age)

(3) Survival:  survival,  death, and cause of death: \_\_\_\_\_, time of death: \_\_\_\_\_ year \_\_\_\_\_ month \_\_\_\_\_ day

(4) Growth and development: body weight:  unknown, or  \_\_\_\_\_ kilogram, Length:  unknown, or  \_\_\_\_\_ centimeter

(5) Hepatitis B vaccine vaccination status:

| Agent times | Vaccination                                                 |                                                                                               |                                                                                                       |                                                                                        |                         |
|-------------|-------------------------------------------------------------|-----------------------------------------------------------------------------------------------|-------------------------------------------------------------------------------------------------------|----------------------------------------------------------------------------------------|-------------------------|
|             | whether or not vaccinate                                    | Vaccination time                                                                              | dosage of inoculation                                                                                 | Vaccine types                                                                          | Vaccination institution |
| second dose | <input type="checkbox"/> yes<br><input type="checkbox"/> no | <input type="checkbox"/> _____ year _____ month _____ day<br><input type="checkbox"/> unknown | <input type="checkbox"/> 10g, <input type="checkbox"/> 20g, or <input type="checkbox"/> others: _____ | <input type="checkbox"/> recombinant yeast<br><input type="checkbox"/> recombinant CHO |                         |
| third dose  | <input type="checkbox"/> yes<br><input type="checkbox"/> no | <input type="checkbox"/> _____ year _____ month _____ day<br><input type="checkbox"/> unknown | <input type="checkbox"/> 10g, <input type="checkbox"/> 20g, or <input type="checkbox"/> others: _____ | <input type="checkbox"/> recombinant yeast<br><input type="checkbox"/> recombinant CHO |                         |
| fourth dose | <input type="checkbox"/> yes<br><input type="checkbox"/> no | <input type="checkbox"/> _____ year _____ month _____ day<br><input type="checkbox"/> unknown | <input type="checkbox"/> 10g, <input type="checkbox"/> 20g, or <input type="checkbox"/> others: _____ | <input type="checkbox"/> recombinant yeast<br><input type="checkbox"/> recombinant CHO |                         |

Remarks (Non-mandatory) \_\_\_\_\_

(6) Detection of serological markers of hepatitis B virus infection:

not tested, reason: \_\_\_\_\_,  testing, testing institution: \_\_\_\_\_

Testing time: \_\_\_\_\_ year \_\_\_\_\_ month \_\_\_\_\_ day

Testing method:  enzyme-linked immunosorbent test,  chemiluminescent,  colloid gold, or  other: \_\_\_\_\_

Testing results: HBsAg:  positive,  negative,  unknown,  other: \_\_\_\_\_

Anti-HBs:  positive, \_\_\_\_\_ mIU/ ml,  negative,  unknown,  other: \_\_\_\_\_

Reporting institution (seal): \_\_\_\_\_ Reporter: \_\_\_\_\_

Contact number: \_\_\_\_\_ Completion date: \_\_\_\_\_ year \_\_\_\_\_ month \_\_\_\_\_ day

Remarks: \_\_\_\_\_

**Table S3** *The national validation indicators for the EMTCT of HBV (2022 edition)*

| <b>Indicator</b>                                                 | <b>Definition</b>                                                                                                                                                                      | <b>Target</b> |
|------------------------------------------------------------------|----------------------------------------------------------------------------------------------------------------------------------------------------------------------------------------|---------------|
| <b>Impact Indicator</b>                                          |                                                                                                                                                                                        |               |
| 1 MTCT rate of HBV                                               | The proportion of infants born to HBsAg positive mothers who test positive for HBsAg within 12 months of age                                                                           | ≤1%           |
| <b>Process Indicators</b>                                        |                                                                                                                                                                                        |               |
| 1 Coverage of ANC                                                | The ratio of the number of women who received at least one ANC to the number of live births                                                                                            | ≥95%          |
| 2 Coverage of HBV screening in pregnant women                    | The proportion of pregnant women who have undergone HBV screening                                                                                                                      | ≥95%          |
| 3 Coverage of HBV early screening in pregnant women              | The proportion of pregnant women who have undergone at least one HBV screening during early pregnancy (within 12 <sup>+6</sup> weeks of gestation)                                     | ≥70%          |
| 4 Coverage of timely birth dose HBIG                             | The proportion of infants born to HBsAg positive mothers who received timely (within 12h of birth) administration of HBIG                                                              | ≥95%          |
| 5 Coverage of timely HepB-BD                                     | The proportion of infants born to HBsAg positive mothers who received timely (within 12h of birth) injection of HepB-BD                                                                | ≥95%          |
| 6 Proportion of three-dose HBV vaccine in HBV-exposed infants    | The proportion of infants born to HBsAg positive mothers who completed the second and third dose HBV vaccine within 12 months of age                                                   | ≥95%          |
| 7 Coverage of PVST in HBV-exposed infants at a high MTCT risk    | The proportion of high-risk infants born to HBsAg positive mothers (maternal HBV DNA viral load ≥2*10 <sup>5</sup> ) who received PVST within 12 months of age after immunoprophylaxis | ≥90%          |
| 8 ART rate for HBsAg positive pregnant women at a high MTCT risk | The proportion of HBsAg positive pregnant women at high risk of MTCT (maternal HBV DNA viral load ≥2*10 <sup>5</sup> ) who received ART                                                | ≥90%          |

*HBV* hepatitis B virus, *MTCT* mother-to-child transmission, *HBsAg* hepatitis B surface antigen, *ANC* antenatal care, *HBIG* hepatitis B immunoglobulin, *HepB-BD* hepatitis B birth dose vaccine, *PVST* post-vaccination serological testing, *HBeAg* hepatitis B e-antigen, *ART* antiviral therapy

**Table S4** Monthly Report on the Prevention of Mother-to-Child Transmission of HIV, Syphilis, and Hepatitis B

( ) Year ( ) month

Province (autonomous region, municipality directly under the central government): \_\_\_\_\_

City (prefecture, state): \_\_\_\_\_

County (district): \_\_\_\_\_

| No. | Item                                 |                                                                      | Numbers                                                                              |         |  |
|-----|--------------------------------------|----------------------------------------------------------------------|--------------------------------------------------------------------------------------|---------|--|
|     |                                      |                                                                      | Male:                                                                                | Female: |  |
| 1   | Pre-marital<br>Testing               | Number of individuals receiving pre-marital healthcare               | Male:                                                                                | Female: |  |
| 2   |                                      | Number of individuals receiving HIV testing                          | Male:                                                                                | Female: |  |
| 3   |                                      | Number of individuals infected with HIV                              | Male:                                                                                | Female: |  |
| 4   | Pregnancy<br>Testing                 | Number of pregnant women receiving antenatal care for the first time |                                                                                      |         |  |
| 5   |                                      | Number of pregnant women receiving HIV testing                       |                                                                                      |         |  |
| 6   |                                      | Number of pregnant women infected with HIV/AIDS                      |                                                                                      |         |  |
| 7   |                                      | Number of pregnant women receiving syphilis testing                  |                                                                                      |         |  |
| 8   |                                      | Number of pregnant women infected with syphilis:                     |                                                                                      |         |  |
| 9   |                                      | Number of pregnant women receiving hepatitis B testing               |                                                                                      |         |  |
| 10  |                                      | Number of pregnant women infected with hepatitis B                   |                                                                                      |         |  |
| 11  | Prenatal testing and<br>intervention | Number of women receiving inpatient delivery services                |                                                                                      |         |  |
| 12  |                                      | HIV                                                                  | Number of pregnant women receiving HIV testing during antenatal and postnatal period |         |  |
| 13  |                                      |                                                                      | Number of pregnant women receiving HIV testing during early pregnancy                |         |  |
| 14  |                                      |                                                                      | Number of pregnant women with positive HIV test results during the early pregnancy   |         |  |
| 15  |                                      |                                                                      | Number of pregnant women receiving HIV testing only during childbirth                |         |  |
| 16  |                                      |                                                                      | Number of pregnant women with positive HIV test results only during childbirth       |         |  |
| 17  |                                      |                                                                      | Total number of pregnant women infected with HIV                                     |         |  |
| 18  |                                      |                                                                      | Number of live births by pregnant women infected with HIV                            |         |  |

|    |                                                                     |                                                                                              |  |
|----|---------------------------------------------------------------------|----------------------------------------------------------------------------------------------|--|
| 19 | syphilis                                                            | Number of pregnant women receiving syphilis testing during antenatal and postnatal period    |  |
| 20 |                                                                     | Number of pregnant women receiving syphilis testing during early pregnancy                   |  |
| 21 |                                                                     | Number of pregnant women with positive syphilis test results during early pregnancy          |  |
| 22 |                                                                     | Number of pregnant women receiving syphilis testing only during childbirth                   |  |
| 23 |                                                                     | Number of pregnant women with positive syphilis test results only during childbirth          |  |
| 24 |                                                                     | Total number of pregnant women infected with syphilis                                        |  |
| 25 |                                                                     | Number of live births by pregnant women infected with syphilis                               |  |
| 26 | hepatitis B                                                         | Number of pregnant women receiving hepatitis B testing during antenatal and postnatal period |  |
| 27 |                                                                     | Number of pregnant women receiving hepatitis B testing during early pregnancy                |  |
| 28 |                                                                     | Number of pregnant women with positive hepatitis B test results during early pregnancy       |  |
| 29 |                                                                     | Number of pregnant women receiving hepatitis B testing only during childbirth                |  |
| 30 |                                                                     | Number of pregnant women with positive hepatitis B test results only during childbirth       |  |
| 31 |                                                                     | Total number of pregnant women infected with hepatitis B                                     |  |
| 32 |                                                                     | Number of live births by pregnant women infected with hepatitis B                            |  |
| 33 |                                                                     | Number of children receiving hepatitis B immunoglobulin injection                            |  |
| 34 | Number of children completing the first dose of hepatitis B vaccine |                                                                                              |  |
| 35 | Number of non-hospitalized women giving birth                       |                                                                                              |  |

Reporting Date:

Responsible staff of reporting institution:

Reporter:

Reporting institution (seal):

Note: The maternal and child health care institutions shall summarize the contents completed by the relevant institutions and fill in them.

**Table S5** Management of HBV ETCT in MCH Settings: Targets, Strategies, and Achievements

| Who                                                          | Where                                     | What                                                                                                                  | Target                                                                                                                                                                                                                          | How (Strategy)                             |
|--------------------------------------------------------------|-------------------------------------------|-----------------------------------------------------------------------------------------------------------------------|---------------------------------------------------------------------------------------------------------------------------------------------------------------------------------------------------------------------------------|--------------------------------------------|
| Pregnant women                                               | 18 Midwifery hospitals                    | HBV Screening                                                                                                         | <input checked="" type="checkbox"/> Coverage of ANC $\geq 95\%$<br><input checked="" type="checkbox"/> Coverage of HBV screening $\geq 95\%$<br><input checked="" type="checkbox"/> Coverage of HBV early screening $\geq 70\%$ | Free HBV screening before ANC registration |
| HBsAg(+) pregnant women                                      | 18 Midwifery hospitals                    | <ul style="list-style-type: none"> <li>• HBV DNA testing</li> <li>• ART for high-risk</li> <li>• Follow-up</li> </ul> | <input checked="" type="checkbox"/> ART rate among high MTCT risk $\geq 90\%$                                                                                                                                                   | E clinic<br>(One-Stop services)            |
| Delivery → Sheet 4-I → Baoan Women's and Children's Hospital |                                           |                                                                                                                       |                                                                                                                                                                                                                                 |                                            |
| HBV-exposed newborns                                         | 18 Midwifery hospitals                    | <ul style="list-style-type: none"> <li>• HepB-BD injection</li> <li>• HBIG administration</li> </ul>                  | <input checked="" type="checkbox"/> Coverage of timely birth dose HBIG $\geq 95\%$<br><input checked="" type="checkbox"/> Coverage of timely HepB-BD $\geq 95\%$                                                                | Immediate immune next to bedside           |
| HBV-exposed infants<br>(within 6 months)                     | Over 140 Community health service centers | 2 <sup>nd</sup> and 3 <sup>rd</sup> Vaccination                                                                       | <input checked="" type="checkbox"/> Proportion of three-dose vaccination $\geq 95\%$                                                                                                                                            | National Immunization Program              |
| HBV-exposed infants<br>(7-12 months)                         | 18 Midwifery Hospitals                    | <ul style="list-style-type: none"> <li>• PVST</li> <li>• Follow-up</li> </ul>                                         | <input checked="" type="checkbox"/> Coverage of PVST among high MTCT risk $\geq 90\%$<br><input checked="" type="checkbox"/> MTCT rate of HBV $\leq 1\%$                                                                        | IM clinic                                  |
| Closed → Sheet 4-II → Baoan Women's and Children's Hospital  |                                           |                                                                                                                       |                                                                                                                                                                                                                                 |                                            |
